# Supplementary material for: An Efficient Method for Estimating Wheat Heading Dates Using UAV Images
Source: MDPI journal article supplement (doi:10.3390/rs13163067), 2021-08-04
Supplement: s1 [file s1]

**Table S1.** Plot designs for field experiments.

| <b>Sowing Date</b> | <b>Densities<br/>Varieties</b> | <b>1.5 Million<br/>Plants/ha</b> | <b>3 Million<br/>Plants/ha</b> | <b>4.5 Million<br/>Plants/ha</b> | <b>6 Million<br/>Plants/ha</b> | <b>7.5 Million<br/>Plants/ha</b> |
|--------------------|--------------------------------|----------------------------------|--------------------------------|----------------------------------|--------------------------------|----------------------------------|
| 5 October          | Jimai 22                       | b <sub>1</sub> I 1               | b <sub>1</sub> I 2             | b <sub>1</sub> I 3               | b <sub>1</sub> I 4             | b <sub>1</sub> I 5               |
|                    | Zhoumai 18                     | b <sub>1</sub> II 1              | b <sub>1</sub> II 2            | b <sub>1</sub> II 3              | b <sub>1</sub> II 4            | b <sub>1</sub> II 5              |
|                    | Xinong 529                     | b <sub>1</sub> III 1             | b <sub>1</sub> III 2           | b <sub>1</sub> III 3             | b <sub>1</sub> III 4           | b <sub>1</sub> III 5             |
| 20 October         | Jimai 22                       | b <sub>2</sub> I 1               | b <sub>2</sub> I 2             | b <sub>2</sub> I 3               | b <sub>2</sub> I 4             | b <sub>2</sub> I 5               |
|                    | Zhoumai 18                     | b <sub>2</sub> II 1              | b <sub>2</sub> II 2            | b <sub>2</sub> II 3              | b <sub>2</sub> II 4            | b <sub>2</sub> II 5              |
|                    | Xinong 529                     | b <sub>2</sub> III 1             | b <sub>2</sub> III 2           | b <sub>2</sub> III 3             | b <sub>2</sub> III 4           | b <sub>2</sub> III 5             |
| 5 November         | Jimai 22                       | b <sub>3</sub> I 1               | b <sub>3</sub> I 2             | b <sub>3</sub> I 3               | b <sub>3</sub> I 4             | b <sub>3</sub> I 5               |
|                    | Zhoumai 18                     | b <sub>3</sub> II 1              | b <sub>3</sub> II 2            | b <sub>3</sub> II 3              | b <sub>3</sub> II 4            | b <sub>3</sub> II 5              |
|                    | Xinong 529                     | b <sub>3</sub> III 1             | b <sub>3</sub> III 2           | b <sub>3</sub> III 3             | b <sub>3</sub> III 4           | b <sub>3</sub> III 5             |
| 15 November        | Jimai 22                       | b <sub>4</sub> I 1               | b <sub>4</sub> I 2             | b <sub>4</sub> I 3               | b <sub>4</sub> I 4             | b <sub>4</sub> I 5               |
|                    | Zhoumai 18                     | b <sub>4</sub> II 1              | b <sub>4</sub> II 2            | b <sub>4</sub> II 3              | b <sub>4</sub> II 4            | b <sub>4</sub> II 5              |
|                    | Xinong 529                     | b <sub>4</sub> III 1             | b <sub>4</sub> III 2           | b <sub>4</sub> III 3             | b <sub>4</sub> III 4           | b <sub>4</sub> III 5             |

**Table S2.** Wheat plant height estimated by full region sampling (unit: cm).

|                      | 6 March | 28 March | 24 April | 21 May | 6 June |
|----------------------|---------|----------|----------|--------|--------|
| b <sub>1</sub> I 1   | 15.51   | 43.11    | 84.28    | 92.02  | 92.11  |
| b <sub>1</sub> I 2   | 12.03   | 34.14    | 73.16    | 82.52  | 83.39  |
| b <sub>1</sub> I 3   | 10.71   | 26.72    | 65.53    | 76.42  | 77.17  |
| b <sub>1</sub> I 4   | 11.26   | 26.35    | 64.89    | 74.53  | 75.79  |
| b <sub>1</sub> I 5   | 12.11   | 23.55    | 62.80    | 75.41  | 74.07  |
| b <sub>1</sub> II 1  | 14.36   | 43.74    | 73.31    | 80.95  | 81.09  |
| b <sub>1</sub> II 2  | 19.86   | 39.40    | 65.93    | 75.88  | 76.40  |
| b <sub>1</sub> II 3  | 16.49   | 32.96    | 58.37    | 69.66  | 70.69  |
| b <sub>1</sub> II 4  | 18.43   | 34.94    | 56.60    | 69.70  | 70.31  |
| b <sub>1</sub> II 5  | 16.22   | 34.39    | 52.93    | 65.17  | 66.28  |
| b <sub>1</sub> III 1 | 15.77   | 44.20    | 73.76    | 78.41  | 78.30  |
| b <sub>1</sub> III 2 | 14.37   | 36.73    | 65.35    | 71.45  | 72.75  |
| b <sub>1</sub> III 3 | 13.16   | 32.66    | 60.86    | 65.08  | 66.71  |
| b <sub>1</sub> III 4 | 16.07   | 33.34    | 60.62    | 66.15  | 67.19  |
| b <sub>1</sub> III 5 | 13.62   | 29.34    | 60.26    | 63.65  | 66.22  |
| b <sub>2</sub> I 1   | 13.23   | 40.14    | 84.65    | 92.96  | 94.01  |
| b <sub>2</sub> I 2   | 16.42   | 43.99    | 83.88    | 93.67  | 93.62  |
| b <sub>2</sub> I 3   | 12.92   | 38.57    | 77.69    | 88.23  | 88.81  |
| b <sub>2</sub> I 4   | 13.99   | 35.51    | 75.98    | 85.67  | 86.78  |
| b <sub>2</sub> I 5   | 13.22   | 33.86    | 74.76    | 84.39  | 85.40  |
| b <sub>2</sub> II 1  | 13.43   | 43.38    | 77.42    | 88.21  | 88.49  |
| b <sub>2</sub> II 2  | 14.97   | 41.35    | 71.88    | 84.11  | 85.01  |
| b <sub>2</sub> II 3  | 16.18   | 41.07    | 68.58    | 81.11  | 82.39  |

|                      |       |       |       |        |        |
|----------------------|-------|-------|-------|--------|--------|
| b <sub>2</sub> II 4  | 14.63 | 38.37 | 64.23 | 78.42  | 79.06  |
| b <sub>2</sub> II 5  | 10.78 | 31.53 | 59.30 | 72.32  | 73.85  |
| b <sub>2</sub> III 1 | 11.53 | 38.85 | 77.57 | 85.14  | 85.79  |
| b <sub>2</sub> III 2 | 10.29 | 38.45 | 73.37 | 81.79  | 81.78  |
| b <sub>2</sub> III 3 | 14.06 | 38.69 | 70.07 | 78.60  | 79.22  |
| b <sub>2</sub> III 4 | 10.92 | 33.83 | 65.11 | 74.99  | 75.20  |
| b <sub>2</sub> III 5 | 11.19 | 31.97 | 63.00 | 72.31  | 73.78  |
| b <sub>3</sub> I 1   | 12.94 | 4.32  | 53.93 | 67.28  | 69.63  |
| b <sub>3</sub> I 2   | 15.47 | 5.67  | 59.20 | 71.47  | 74.38  |
| b <sub>3</sub> I 3   | 11.27 | 4.19  | 61.07 | 74.10  | 76.70  |
| b <sub>3</sub> I 4   | 9.43  | 5.17  | 60.48 | 76.67  | 79.67  |
| b <sub>3</sub> I 5   | 15.01 | 10.75 | 67.30 | 82.86  | 86.16  |
| b <sub>3</sub> II 1  | 9.43  | 3.70  | 55.76 | 68.11  | 70.01  |
| b <sub>3</sub> II 2  | 11.50 | 5.36  | 57.41 | 70.37  | 72.69  |
| b <sub>3</sub> II 3  | 11.93 | 6.24  | 59.26 | 72.16  | 75.42  |
| b <sub>3</sub> II 4  | 15.23 | 12.93 | 62.06 | 78.12  | 80.40  |
| b <sub>3</sub> II 5  | 14.45 | 28.10 | 62.22 | 78.43  | 80.97  |
| b <sub>3</sub> III 1 | 20.53 | 13.93 | 62.64 | 73.93  | 75.66  |
| b <sub>3</sub> III 2 | 17.91 | 9.56  | 60.27 | 72.17  | 74.27  |
| b <sub>3</sub> III 3 | 13.88 | 7.89  | 61.39 | 72.20  | 74.36  |
| b <sub>3</sub> III 4 | 19.19 | 19.25 | 67.95 | 79.79  | 80.96  |
| b <sub>3</sub> III 5 | 14.79 | 23.43 | 66.69 | 79.07  | 80.92  |
| b <sub>4</sub> I 1   | 9.36  | 45.46 | 90.46 | 108.03 | 107.37 |
| b <sub>4</sub> I 2   | 13.91 | 43.97 | 91.27 | 110.09 | 109.16 |
| b <sub>4</sub> I 3   | 8.86  | 41.09 | 91.50 | 113.14 | 110.63 |
| b <sub>4</sub> I 4   | 8.49  | 41.31 | 94.88 | 114.49 | 112.45 |
| b <sub>4</sub> I 5   | 8.82  | 39.02 | 93.75 | 112.52 | 110.17 |
| b <sub>4</sub> II 1  | 9.25  | 47.13 | 94.61 | 110.24 | 110.84 |
| b <sub>4</sub> II 2  | 7.10  | 42.19 | 93.79 | 111.64 | 110.08 |
| b <sub>4</sub> II 3  | 8.70  | 44.54 | 92.63 | 111.39 | 108.80 |
| b <sub>4</sub> II 4  | 9.83  | 44.44 | 92.79 | 110.37 | 108.44 |
| b <sub>4</sub> II 5  | 10.33 | 44.23 | 93.60 | 112.21 | 110.02 |
| b <sub>4</sub> III 1 | 12.61 | 51.05 | 96.34 | 112.24 | 115.73 |
| b <sub>4</sub> III 2 | 12.17 | 47.03 | 98.62 | 115.72 | 115.05 |
| b <sub>4</sub> III 3 | 11.22 | 45.64 | 96.48 | 115.55 | 112.33 |
| b <sub>4</sub> III 4 | 10.53 | 48.08 | 98.86 | 114.69 | 111.85 |
| b <sub>4</sub> III 5 | 10.70 | 46.78 | 97.70 | 113.51 | 111.46 |
| b <sub>5</sub> I 1   | 14.85 | 18.98 | 66.11 | 85.11  | 84.78  |
| b <sub>5</sub> I 2   | 9.30  | 13.56 | 65.85 | 85.93  | 85.42  |
| b <sub>5</sub> I 3   | 15.05 | 13.41 | 63.18 | 83.43  | 83.29  |
| b <sub>5</sub> I 4   | 13.63 | 10.84 | 61.70 | 82.32  | 82.77  |
| b <sub>5</sub> I 5   | 11.53 | 10.00 | 60.68 | 80.46  | 80.38  |
| b <sub>5</sub> II 1  | 16.98 | 22.84 | 67.86 | 82.43  | 81.36  |
| b <sub>5</sub> II 2  | 11.77 | 15.95 | 62.17 | 78.64  | 78.07  |

|                      |       |       |       |       |       |
|----------------------|-------|-------|-------|-------|-------|
| b <sub>5</sub> II 3  | 14.01 | 16.81 | 59.58 | 76.98 | 76.93 |
| b <sub>5</sub> II 4  | 15.74 | 12.39 | 56.92 | 75.88 | 76.61 |
| b <sub>5</sub> II 5  | 14.81 | 17.78 | 58.79 | 75.77 | 76.78 |
| b <sub>5</sub> III 1 | 16.54 | 20.99 | 68.15 | 84.71 | 83.96 |
| b <sub>5</sub> III 2 | 10.41 | 13.50 | 63.92 | 82.77 | 81.27 |
| b <sub>5</sub> III 3 | 17.32 | 19.01 | 65.26 | 84.45 | 84.48 |
| b <sub>5</sub> III 4 | 18.41 | 15.08 | 61.69 | 81.55 | 80.45 |
| b <sub>5</sub> III 5 | 16.91 | 15.57 | 58.02 | 78.77 | 79.41 |

**Table S3.** Wheat plant height estimated by random sampling (unit: cm).

|                      | 6 March | 28 March | 24 April | 21 May | 6 June |
|----------------------|---------|----------|----------|--------|--------|
| b <sub>1</sub> I 1   | 11.00   | 39.53    | 79.48    | 88.68  | 88.30  |
| b <sub>1</sub> I 2   | 4.95    | 25.37    | 64.48    | 77.07  | 77.57  |
| b <sub>1</sub> I 3   | 5.43    | 22.92    | 59.30    | 74.34  | 74.34  |
| b <sub>1</sub> I 4   | 3.30    | 20.77    | 57.52    | 71.64  | 71.40  |
| b <sub>1</sub> I 5   | 4.58    | 16.87    | 57.14    | 73.14  | 60.79  |
| b <sub>1</sub> II 1  | 7.84    | 36.59    | 67.99    | 77.70  | 75.84  |
| b <sub>1</sub> II 2  | 7.79    | 28.32    | 56.33    | 67.89  | 68.06  |
| b <sub>1</sub> II 3  | 5.57    | 22.85    | 48.10    | 63.91  | 64.66  |
| b <sub>1</sub> II 4  | 4.15    | 21.01    | 46.39    | 63.78  | 64.43  |
| b <sub>1</sub> II 5  | 5.73    | 26.39    | 44.38    | 61.29  | 59.94  |
| b <sub>1</sub> III 1 | 8.75    | 40.19    | 80.86    | 94.66  | 74.17  |
| b <sub>1</sub> III 2 | 5.85    | 31.72    | 58.08    | 65.69  | 68.21  |
| b <sub>1</sub> III 3 | 5.93    | 27.61    | 54.55    | 28.61  | 21.09  |
| b <sub>1</sub> III 4 | 7.46    | 26.22    | 53.37    | 60.73  | 61.77  |
| b <sub>1</sub> III 5 | 7.26    | 24.49    | 52.25    | 40.24  | 30.33  |
| b <sub>2</sub> I 1   | 5.62    | 37.84    | 92.72    | 106.32 | 94.12  |
| b <sub>2</sub> I 2   | 6.88    | 38.72    | 75.35    | 92.14  | 91.20  |
| b <sub>2</sub> I 3   | 7.40    | 32.11    | 71.62    | 86.35  | 85.37  |
| b <sub>2</sub> I 4   | 6.68    | 32.15    | 75.11    | 84.71  | 85.74  |
| b <sub>2</sub> I 5   | 8.60    | 29.44    | 72.01    | 83.89  | 84.67  |
| b <sub>2</sub> II 1  | 10.43   | 39.85    | 74.64    | 83.97  | 83.99  |
| b <sub>2</sub> II 2  | 7.73    | 38.96    | 68.62    | 81.03  | 80.19  |
| b <sub>2</sub> II 3  | 13.28   | 36.59    | 64.80    | 78.08  | 79.86  |
| b <sub>2</sub> II 4  | 12.29   | 37.08    | 62.13    | 77.31  | 77.24  |
| b <sub>2</sub> II 5  | 8.22    | 29.04    | 57.34    | 70.64  | 72.08  |
| b <sub>2</sub> III 1 | 5.36    | 35.43    | 74.69    | 82.31  | 82.63  |
| b <sub>2</sub> III 2 | 5.71    | 37.87    | 70.25    | 80.02  | 80.01  |
| b <sub>2</sub> III 3 | 10.21   | 37.02    | 68.66    | 76.96  | 78.66  |
| b <sub>2</sub> III 4 | 13.50   | 37.82    | 69.35    | 78.90  | 78.36  |
| b <sub>2</sub> III 5 | 8.65    | 29.44    | 61.35    | 70.71  | 69.61  |
| b <sub>3</sub> I 1   | 2.92    | -3.75    | 51.69    | 66.74  | 68.39  |
| b <sub>3</sub> I 2   | 1.71    | -3.74    | 54.47    | 68.91  | 71.10  |
| b <sub>3</sub> I 3   | 3.41    | 0.56     | 57.75    | 72.30  | 74.92  |

|                      |       |       |       |        |        |
|----------------------|-------|-------|-------|--------|--------|
| b <sub>3</sub> I 4   | 3.58  | 5.45  | 59.53 | 77.06  | 78.68  |
| b <sub>3</sub> I 5   | 2.69  | 1.38  | 59.97 | 75.38  | 80.63  |
| b <sub>3</sub> II 1  | 5.24  | 2.02  | 59.57 | 65.88  | 67.52  |
| b <sub>3</sub> II 2  | 7.83  | 2.75  | 55.69 | 68.83  | 70.83  |
| b <sub>3</sub> II 3  | 6.46  | 1.73  | 57.15 | 69.76  | 73.23  |
| b <sub>3</sub> II 4  | 9.53  | 3.91  | 55.96 | 73.81  | 77.10  |
| b <sub>3</sub> II 5  | 8.71  | 12.23 | 60.77 | 75.57  | 79.22  |
| b <sub>3</sub> III 1 | 9.68  | 5.92  | 59.00 | 71.69  | 73.21  |
| b <sub>3</sub> III 2 | 10.84 | 3.29  | 60.08 | 70.18  | 72.87  |
| b <sub>3</sub> III 3 | 7.71  | 0.94  | 59.94 | 70.07  | 72.86  |
| b <sub>3</sub> III 4 | 10.58 | 14.89 | 64.00 | 76.40  | 77.47  |
| b <sub>3</sub> III 5 | 10.42 | 18.21 | 65.15 | 77.27  | 79.92  |
| b <sub>4</sub> I 1   | 1.34  | 36.76 | 84.68 | 103.40 | 105.26 |
| b <sub>4</sub> I 2   | 3.22  | 34.45 | 85.90 | 104.91 | 103.35 |
| b <sub>4</sub> I 3   | 4.18  | 35.65 | 89.86 | 111.25 | 109.65 |
| b <sub>4</sub> I 4   | 4.76  | 33.74 | 91.66 | 113.41 | 110.73 |
| b <sub>4</sub> I 5   | 5.23  | 33.55 | 94.20 | 112.49 | 108.30 |
| b <sub>4</sub> II 1  | 1.98  | 41.35 | 91.03 | 108.25 | 107.34 |
| b <sub>4</sub> II 2  | 3.85  | 39.40 | 93.68 | 110.98 | 109.31 |
| b <sub>4</sub> II 3  | 2.37  | 38.31 | 90.67 | 109.64 | 106.68 |
| b <sub>4</sub> II 4  | 2.76  | 41.91 | 92.54 | 110.27 | 108.30 |
| b <sub>4</sub> II 5  | 4.47  | 38.06 | 92.05 | 108.64 | 106.78 |
| b <sub>4</sub> III 1 | 3.83  | 41.39 | 92.32 | 109.61 | 112.41 |
| b <sub>4</sub> III 2 | 5.21  | 42.04 | 97.82 | 113.79 | 115.40 |
| b <sub>4</sub> III 3 | 3.03  | 39.72 | 93.93 | 111.29 | 111.18 |
| b <sub>4</sub> III 4 | 5.09  | 43.85 | 97.26 | 114.27 | 111.66 |
| b <sub>4</sub> III 5 | 5.40  | 38.94 | 96.98 | 114.38 | 111.81 |
| b <sub>5</sub> I 1   | 4.18  | 10.01 | 61.94 | 82.36  | 80.26  |
| b <sub>5</sub> I 2   | 2.55  | 8.43  | 91.72 | 101.48 | 81.44  |
| b <sub>5</sub> I 3   | 10.49 | 7.69  | 60.09 | 81.38  | 82.18  |
| b <sub>5</sub> I 4   | 2.58  | 4.80  | 60.27 | 82.65  | 81.59  |
| b <sub>5</sub> I 5   | 2.03  | 5.66  | 57.83 | 78.88  | 78.22  |
| b <sub>5</sub> II 1  | 5.51  | 14.73 | 65.75 | 81.36  | 79.62  |
| b <sub>5</sub> II 2  | 3.92  | 10.65 | 59.63 | 76.89  | 76.15  |
| b <sub>5</sub> II 3  | 8.34  | 12.00 | 57.24 | 76.21  | 75.93  |
| b <sub>5</sub> II 4  | 4.42  | 9.27  | 56.75 | 76.47  | 76.72  |
| b <sub>5</sub> II 5  | 4.60  | 15.26 | 56.41 | 74.55  | 76.14  |
| b <sub>5</sub> III 1 | 3.30  | 11.54 | 63.50 | 86.37  | 80.94  |
| b <sub>5</sub> III 2 | 3.55  | 8.08  | 60.13 | 81.46  | 80.24  |
| b <sub>5</sub> III 3 | 9.32  | 14.45 | 61.08 | 85.08  | 82.60  |
| b <sub>5</sub> III 4 | 5.76  | 11.17 | 59.20 | 81.61  | 78.23  |
| b <sub>5</sub> III 5 | 4.38  | 15.29 | 55.12 | 77.65  | 76.24  |

---

**Table S4.** Wheat plant height estimated of sample 1 by equal interval sampling (unit: cm).

|                      | 6 March | 28 March | 24 April | 21 May | 6 June |
|----------------------|---------|----------|----------|--------|--------|
| b <sub>1</sub> I 1   | 9.89    | 36.76    | 79.40    | 89.58  | 89.49  |
| b <sub>1</sub> I 2   | 6.24    | 24.56    | 63.26    | 76.65  | 76.63  |
| b <sub>1</sub> I 3   | 2.90    | 21.04    | 57.51    | 70.52  | 71.04  |
| b <sub>1</sub> I 4   | 4.91    | 17.70    | 53.63    | 72.14  | 72.37  |
| b <sub>1</sub> I 5   | 3.51    | 14.35    | 54.33    | 72.56  | 18.51  |
| b <sub>1</sub> II 1  | 6.71    | 36.98    | 66.45    | 76.50  | 76.44  |
| b <sub>1</sub> II 2  | 4.75    | 23.95    | 50.14    | 65.13  | 66.31  |
| b <sub>1</sub> II 3  | 4.12    | 22.72    | 46.15    | 64.49  | 66.40  |
| b <sub>1</sub> II 4  | 6.23    | 17.99    | 42.27    | 62.39  | 63.47  |
| b <sub>1</sub> II 5  | 5.97    | 31.46    | 44.47    | 59.62  | 48.33  |
| b <sub>1</sub> III 1 | 7.20    | 37.22    | 74.86    | 70.99  | 71.60  |
| b <sub>1</sub> III 2 | 8.19    | 29.72    | 60.46    | 66.96  | 69.51  |
| b <sub>1</sub> III 3 | 7.15    | 26.93    | 54.10    | 61.33  | 63.03  |
| b <sub>1</sub> III 4 | 7.78    | 25.84    | 53.32    | 61.09  | 63.11  |
| b <sub>1</sub> III 5 | 6.34    | 21.65    | 50.66    | -5.85  | -12.02 |
| b <sub>2</sub> I 1   | 3.57    | 32.16    | 92.04    | 89.57  | 89.88  |
| b <sub>2</sub> I 2   | 5.80    | 35.58    | 75.13    | 89.06  | 90.61  |
| b <sub>2</sub> I 3   | 6.73    | 34.14    | 74.54    | 87.57  | 89.54  |
| b <sub>2</sub> I 4   | 6.40    | 31.07    | 69.96    | 81.48  | 82.78  |
| b <sub>2</sub> I 5   | 8.18    | 30.33    | 70.03    | 85.45  | 86.98  |
| b <sub>2</sub> II 1  | 9.02    | 40.88    | 74.89    | 83.63  | 84.14  |
| b <sub>2</sub> II 2  | 10.71   | 37.15    | 67.03    | 78.94  | 80.25  |
| b <sub>2</sub> II 3  | 8.21    | 34.15    | 63.78    | 77.00  | 76.71  |
| b <sub>2</sub> II 4  | 5.97    | 31.97    | 58.63    | 72.46  | 72.79  |
| b <sub>2</sub> II 5  | 8.93    | 31.58    | 59.89    | 73.43  | 76.37  |
| b <sub>2</sub> III 1 | 3.93    | 33.84    | 73.09    | 80.16  | 80.91  |
| b <sub>2</sub> III 2 | 8.18    | 37.21    | 69.01    | 78.13  | 78.99  |
| b <sub>2</sub> III 3 | 10.88   | 36.64    | 65.85    | 76.24  | 76.96  |
| b <sub>2</sub> III 4 | 9.45    | 32.90    | 62.44    | 71.97  | 73.34  |
| b <sub>2</sub> III 5 | 5.02    | 30.18    | 60.25    | 69.84  | 72.23  |
| b <sub>3</sub> I 1   | 3.81    | -3.04    | 54.52    | 67.13  | 70.19  |
| b <sub>3</sub> I 2   | 2.65    | -1.33    | 57.37    | 70.89  | 74.41  |
| b <sub>3</sub> I 3   | 2.16    | -2.62    | 59.07    | 72.96  | 75.10  |
| b <sub>3</sub> I 4   | 3.04    | -0.04    | 59.03    | 75.14  | 76.60  |
| b <sub>3</sub> I 5   | 3.11    | 1.71     | 61.32    | 77.50  | 81.22  |
| b <sub>3</sub> II 1  | 5.03    | -0.46    | 52.33    | 63.50  | 65.69  |
| b <sub>3</sub> II 2  | 5.49    | 1.90     | 55.94    | 67.33  | 70.89  |
| b <sub>3</sub> II 3  | 5.92    | -0.43    | 56.26    | 69.08  | 70.38  |
| b <sub>3</sub> II 4  | 4.81    | -0.28    | 51.66    | 72.25  | 74.89  |
| b <sub>3</sub> II 5  | 7.33    | 27.48    | 59.87    | 77.71  | 80.24  |
| b <sub>3</sub> III 1 | 10.51   | 6.67     | 58.53    | 72.66  | 72.73  |
| b <sub>3</sub> III 2 | 6.74    | -0.16    | 57.20    | 67.76  | 71.17  |

|                     |      |       |       |        |        |
|---------------------|------|-------|-------|--------|--------|
| b <sub>3</sub> III3 | 6.61 | -1.24 | 58.47 | 71.11  | 72.88  |
| b <sub>3</sub> III4 | 8.79 | 5.57  | 60.72 | 76.13  | 76.37  |
| b <sub>3</sub> III5 | 6.02 | 26.63 | 62.19 | 74.89  | 76.17  |
| b <sub>4</sub> I 1  | 2.52 | 33.31 | 69.97 | 97.05  | 100.95 |
| b <sub>4</sub> I 2  | 1.47 | 30.35 | 80.91 | 104.75 | 103.18 |
| b <sub>4</sub> I 3  | 3.02 | 31.41 | 84.08 | 105.39 | 102.86 |
| b <sub>4</sub> I 4  | 1.91 | 31.56 | 92.17 | 113.04 | 109.72 |
| b <sub>4</sub> I 5  | 2.30 | 29.47 | 85.23 | 107.28 | 104.52 |
| b <sub>4</sub> II 1 | 2.72 | 38.26 | 91.01 | 105.94 | 107.90 |
| b <sub>4</sub> II 2 | 2.48 | 36.83 | 91.27 | 110.62 | 107.63 |
| b <sub>4</sub> II 3 | 2.06 | 36.36 | 89.32 | 109.07 | 106.06 |
| b <sub>4</sub> II 4 | 1.97 | 34.78 | 90.37 | 110.04 | 107.99 |
| b <sub>4</sub> II 5 | 3.54 | 37.44 | 90.74 | 109.66 | 107.97 |
| b <sub>4</sub> III1 | 2.01 | 39.22 | 91.19 | 110.59 | 112.62 |
| b <sub>4</sub> III2 | 3.20 | 37.51 | 91.68 | 111.11 | 112.64 |
| b <sub>4</sub> III3 | 2.05 | 35.41 | 90.55 | 110.05 | 108.72 |
| b <sub>4</sub> III4 | 3.68 | 40.32 | 95.52 | 112.19 | 111.61 |
| b <sub>4</sub> III5 | 3.27 | 34.67 | 91.87 | 109.76 | 106.77 |
| b <sub>5</sub> I 1  | 1.59 | 6.39  | 60.60 | 79.97  | 80.33  |
| b <sub>5</sub> I 2  | 2.45 | 5.62  | 88.39 | 103.54 | 82.27  |
| b <sub>5</sub> I 3  | 2.99 | 4.77  | 60.32 | 82.10  | 82.60  |
| b <sub>5</sub> I 4  | 2.46 | 1.79  | 58.11 | 81.00  | 80.25  |
| b <sub>5</sub> I 5  | 2.57 | -0.12 | 56.66 | 76.92  | 77.27  |
| b <sub>5</sub> II 1 | 5.62 | 13.04 | 59.77 | 76.62  | 74.71  |
| b <sub>5</sub> II 2 | 2.87 | 10.59 | 57.33 | 75.40  | 73.81  |
| b <sub>5</sub> II 3 | 3.40 | 9.35  | 56.55 | 75.25  | 76.24  |
| b <sub>5</sub> II 4 | 3.07 | 8.57  | 54.64 | 74.46  | 75.60  |
| b <sub>5</sub> II 5 | 2.25 | 14.45 | 52.04 | 70.53  | 71.18  |
| b <sub>5</sub> III1 | 3.08 | 8.19  | 61.09 | 79.02  | 78.74  |
| b <sub>5</sub> III2 | 4.29 | 6.46  | 59.38 | 81.67  | 80.39  |
| b <sub>5</sub> III3 | 5.77 | 10.42 | 57.23 | 80.19  | 79.58  |
| b <sub>5</sub> III4 | 4.65 | 12.28 | 54.94 | 78.81  | 79.62  |
| b <sub>5</sub> III5 | 3.16 | 10.81 | 51.84 | 78.80  | 77.35  |

**Table S5.** Wheat plant height estimated of sample 2 by equal interval sampling (unit: cm).

|                     | 6 March | 28 March | 24 April | 21 May | 6 June |
|---------------------|---------|----------|----------|--------|--------|
| b <sub>1</sub> I 1  | 12.67   | 44.66    | 80.64    | 88.86  | 90.11  |
| b <sub>1</sub> I 2  | 5.84    | 27.12    | 64.34    | 78.76  | 79.26  |
| b <sub>1</sub> I 3  | 3.40    | 22.95    | 59.54    | 73.79  | 75.13  |
| b <sub>1</sub> I 4  | 4.61    | 18.68    | 55.64    | 72.44  | 62.04  |
| b <sub>1</sub> I 5  | 2.95    | 16.44    | 58.03    | 74.44  | 1.87   |
| b <sub>1</sub> II 1 | 6.75    | 34.59    | 62.91    | 73.08  | 73.39  |
| b <sub>1</sub> II 2 | 9.98    | 32.87    | 61.69    | 72.65  | 74.27  |
| b <sub>1</sub> II 3 | 4.64    | 21.70    | 47.14    | 62.68  | 64.30  |

|                      |       |       |       |        |        |
|----------------------|-------|-------|-------|--------|--------|
| b <sub>1</sub> II 4  | 7.53  | 25.16 | 48.44 | 64.70  | 66.46  |
| b <sub>1</sub> II 5  | 5.65  | 23.63 | 44.46 | 60.07  | 58.98  |
| b <sub>1</sub> III 1 | 10.44 | 44.99 | 83.32 | 97.69  | 75.92  |
| b <sub>1</sub> III 2 | 6.88  | 30.65 | 58.24 | 66.96  | 67.97  |
| b <sub>1</sub> III 3 | 4.17  | 24.23 | 54.51 | 62.51  | 62.63  |
| b <sub>1</sub> III 4 | 6.84  | 14.78 | 52.36 | 54.45  | 57.45  |
| b <sub>1</sub> III 5 | 4.43  | 20.67 | 53.91 | 7.89   | 1.11   |
| b <sub>2</sub> I 1   | 5.52  | 36.33 | 90.14 | 98.30  | 92.23  |
| b <sub>2</sub> I 2   | 6.77  | 37.72 | 74.74 | 89.38  | 90.20  |
| b <sub>2</sub> I 3   | 4.96  | 35.02 | 73.93 | 89.35  | 83.74  |
| b <sub>2</sub> I 4   | 5.63  | 32.22 | 71.07 | 84.95  | 85.98  |
| b <sub>2</sub> I 5   | 6.48  | 29.11 | 69.90 | 82.52  | 85.13  |
| b <sub>2</sub> II 1  | 6.64  | 39.82 | 72.80 | 83.40  | 83.65  |
| b <sub>2</sub> II 2  | 9.52  | 40.65 | 67.63 | 80.33  | 81.17  |
| b <sub>2</sub> II 3  | 11.05 | 39.66 | 65.63 | 78.55  | 79.68  |
| b <sub>2</sub> II 4  | 12.68 | 39.45 | 66.87 | 80.44  | 80.05  |
| b <sub>2</sub> II 5  | 8.32  | 30.56 | 59.84 | 72.74  | 72.68  |
| b <sub>2</sub> III 1 | 4.63  | 34.11 | 74.08 | 80.85  | 81.91  |
| b <sub>2</sub> III 2 | 4.94  | 35.28 | 69.75 | 79.10  | 80.34  |
| b <sub>2</sub> III 3 | 12.35 | 39.03 | 68.40 | 76.68  | 79.42  |
| b <sub>2</sub> III 4 | 6.28  | 29.02 | 62.38 | 73.64  | 74.88  |
| b <sub>2</sub> III 5 | 6.61  | 29.43 | 62.57 | 71.40  | 73.22  |
| b <sub>3</sub> I 1   | 2.56  | -4.06 | 51.17 | 65.87  | 68.36  |
| b <sub>3</sub> I 2   | 1.81  | -4.97 | 52.18 | 68.39  | 71.15  |
| b <sub>3</sub> I 3   | 3.84  | -1.44 | 57.74 | 73.15  | 76.01  |
| b <sub>3</sub> I 4   | 2.69  | 6.58  | 58.10 | 77.36  | 80.42  |
| b <sub>3</sub> I 5   | 3.49  | 2.38  | 60.79 | 76.14  | 80.03  |
| b <sub>3</sub> II 1  | 4.62  | -0.23 | 51.97 | 64.96  | 67.68  |
| b <sub>3</sub> II 2  | 6.09  | 2.20  | 54.35 | 66.90  | 69.41  |
| b <sub>3</sub> II 3  | 5.19  | 1.18  | 55.50 | 68.69  | 71.37  |
| b <sub>3</sub> II 4  | 7.01  | 5.40  | 58.35 | 73.27  | 75.34  |
| b <sub>3</sub> II 5  | 8.46  | 4.98  | 61.94 | 76.30  | 79.06  |
| b <sub>3</sub> III 1 | 9.27  | 4.52  | 55.01 | 68.10  | 69.87  |
| b <sub>3</sub> III 2 | 9.20  | 2.71  | 58.14 | 70.59  | 71.40  |
| b <sub>3</sub> III 3 | 6.16  | 1.13  | 59.15 | 69.84  | 71.40  |
| b <sub>3</sub> III 4 | 11.55 | 9.48  | 64.64 | 77.27  | 78.92  |
| b <sub>3</sub> III 5 | 9.70  | 29.11 | 63.27 | 76.46  | 78.77  |
| b <sub>4</sub> I 1   | 2.57  | 34.06 | 84.80 | 105.35 | 105.41 |
| b <sub>4</sub> I 2   | 2.22  | 30.53 | 77.36 | 103.25 | 97.61  |
| b <sub>4</sub> I 3   | 4.48  | 33.37 | 91.79 | 114.63 | 111.66 |
| b <sub>4</sub> I 4   | 1.71  | 31.07 | 90.17 | 111.37 | 109.05 |
| b <sub>4</sub> I 5   | 3.88  | 31.81 | 91.23 | 112.03 | 108.66 |
| b <sub>4</sub> II 1  | 2.68  | 38.08 | 88.42 | 106.51 | 106.91 |
| b <sub>4</sub> II 2  | 3.70  | 37.56 | 92.01 | 112.79 | 108.78 |

|                      |      |       |       |        |        |
|----------------------|------|-------|-------|--------|--------|
| b <sub>4</sub> II 3  | 2.79 | 36.70 | 91.39 | 109.73 | 107.27 |
| b <sub>4</sub> II 4  | 2.09 | 38.75 | 91.21 | 109.09 | 107.36 |
| b <sub>4</sub> II 5  | 3.44 | 38.10 | 90.81 | 107.70 | 106.31 |
| b <sub>4</sub> III 1 | 2.65 | 40.07 | 89.22 | 109.67 | 122.64 |
| b <sub>4</sub> III 2 | 4.45 | 41.20 | 97.28 | 116.96 | 116.54 |
| b <sub>4</sub> III 3 | 2.45 | 36.17 | 94.43 | 111.34 | 111.09 |
| b <sub>4</sub> III 4 | 3.50 | 43.24 | 95.73 | 113.91 | 110.54 |
| b <sub>4</sub> III 5 | 2.85 | 34.38 | 90.56 | 109.40 | 105.93 |
| b <sub>5</sub> I 1   | 2.99 | 8.08  | 59.14 | 79.46  | 79.95  |
| b <sub>5</sub> I 2   | 2.74 | 5.53  | 72.82 | 105.24 | 80.01  |
| b <sub>5</sub> I 3   | 2.68 | 3.10  | 58.14 | 79.03  | 80.66  |
| b <sub>5</sub> I 4   | 1.92 | 3.24  | 59.54 | 82.09  | 80.50  |
| b <sub>5</sub> I 5   | 1.84 | 1.02  | 55.33 | 77.41  | 75.09  |
| b <sub>5</sub> II 1  | 6.56 | 14.23 | 64.61 | 80.13  | 79.95  |
| b <sub>5</sub> II 2  | 3.76 | 10.20 | 56.86 | 76.29  | 75.68  |
| b <sub>5</sub> II 3  | 2.94 | 6.20  | 55.15 | 74.30  | 74.33  |
| b <sub>5</sub> II 4  | 2.69 | 5.40  | 53.15 | 74.57  | 75.70  |
| b <sub>5</sub> II 5  | 3.36 | 14.74 | 55.21 | 73.22  | 73.40  |
| b <sub>5</sub> III 1 | 2.79 | 8.87  | 59.35 | 78.87  | 77.78  |
| b <sub>5</sub> III 2 | 2.98 | 5.57  | 58.53 | 80.46  | 79.79  |
| b <sub>5</sub> III 3 | 4.48 | 8.37  | 56.72 | 82.12  | 81.23  |
| b <sub>5</sub> III 4 | 6.55 | 8.34  | 57.28 | 81.72  | 77.67  |
| b <sub>5</sub> III 5 | 4.30 | 11.33 | 51.73 | 76.64  | 78.19  |

**Table S6.** Wheat plant height estimated of sample 3 by equal interval sampling (unit: cm).

|                      | 6 March | 28 March | 24 April | 21 May | 6 June |
|----------------------|---------|----------|----------|--------|--------|
| b <sub>1</sub> I 1   | 7.12    | 35.08    | 75.35    | 85.18  | 84.57  |
| b <sub>1</sub> I 2   | 6.82    | 24.65    | 63.32    | 76.48  | 75.26  |
| b <sub>1</sub> I 3   | 4.27    | 18.87    | 53.33    | 71.10  | 71.36  |
| b <sub>1</sub> I 4   | 3.01    | 18.51    | 53.67    | 71.66  | 70.95  |
| b <sub>1</sub> I 5   | 5.83    | 16.67    | 55.18    | 73.89  | 73.44  |
| b <sub>1</sub> II 1  | 11.20   | 38.56    | 67.49    | 78.96  | 79.77  |
| b <sub>1</sub> II 2  | 8.21    | 26.84    | 53.88    | 69.23  | 70.29  |
| b <sub>1</sub> II 3  | 5.98    | 21.47    | 46.35    | 62.51  | 55.32  |
| b <sub>1</sub> II 4  | 9.37    | 21.73    | 45.34    | 64.88  | 66.58  |
| b <sub>1</sub> II 5  | 9.19    | 34.78    | 48.48    | 63.38  | 63.61  |
| b <sub>1</sub> III 1 | 9.57    | 39.05    | 78.47    | 72.18  | 73.15  |
| b <sub>1</sub> III 2 | 5.91    | 26.41    | 56.21    | 63.39  | 66.47  |
| b <sub>1</sub> III 3 | 12.82   | 28.53    | 60.87    | 39.55  | 30.62  |
| b <sub>1</sub> III 4 | 12.92   | 30.74    | 60.47    | 62.20  | 62.24  |
| b <sub>1</sub> III 5 | 7.10    | 21.25    | 50.32    | 46.70  | 52.98  |
| b <sub>2</sub> I 1   | 5.86    | 39.79    | 92.44    | 107.20 | 94.45  |
| b <sub>2</sub> I 2   | 6.75    | 37.46    | 77.35    | 92.18  | 90.56  |
| b <sub>2</sub> I 3   | 17.10   | 29.65    | 73.11    | 86.67  | 82.69  |



|                      |       |       |       |        |        |
|----------------------|-------|-------|-------|--------|--------|
| b <sub>2</sub> I 4   | 6.81  | 29.95 | 69.18 | 81.55  | 82.37  |
| b <sub>2</sub> I 5   | 6.83  | 26.70 | 66.10 | 82.38  | 84.16  |
| b <sub>2</sub> II 1  | 9.38  | 41.96 | 75.28 | 86.16  | 86.38  |
| b <sub>2</sub> II 2  | 9.81  | 37.87 | 65.78 | 78.92  | 78.71  |
| b <sub>2</sub> II 3  | 15.69 | 35.47 | 64.97 | 77.74  | 79.07  |
| b <sub>2</sub> II 4  | 6.81  | 29.55 | 53.85 | 69.03  | 70.09  |
| b <sub>2</sub> II 5  | 8.68  | 29.24 | 57.32 | 70.62  | 71.32  |
| b <sub>2</sub> III 1 | 6.64  | 37.20 | 75.29 | 83.58  | 83.95  |
| b <sub>2</sub> III 2 | 5.19  | 36.63 | 68.58 | 77.03  | 75.78  |
| b <sub>2</sub> III 3 | 8.68  | 33.28 | 66.34 | 75.82  | 76.93  |
| b <sub>2</sub> III 4 | 12.30 | 34.75 | 66.55 | 73.50  | 71.28  |
| b <sub>2</sub> III 5 | 4.47  | 26.77 | 55.11 | 65.06  | 59.65  |
| b <sub>3</sub> I 1   | 1.97  | -4.17 | 52.06 | 65.71  | 69.21  |
| b <sub>3</sub> I 2   | 2.06  | -3.84 | 54.63 | 69.59  | 71.57  |
| b <sub>3</sub> I 3   | 4.71  | -1.13 | 60.66 | 73.32  | 76.43  |
| b <sub>3</sub> I 4   | 4.35  | 15.67 | 58.18 | 75.00  | 76.90  |
| b <sub>3</sub> I 5   | 3.81  | 1.29  | 58.53 | 75.57  | 79.80  |
| b <sub>3</sub> II 1  | 4.55  | 0.28  | 52.98 | 63.99  | 65.87  |
| b <sub>3</sub> II 2  | 7.01  | 4.67  | 57.36 | 69.35  | 71.86  |
| b <sub>3</sub> II 3  | 5.75  | -2.16 | 56.24 | 68.58  | 71.65  |
| b <sub>3</sub> II 4  | 7.07  | 1.70  | 56.42 | 72.95  | 74.50  |
| b <sub>3</sub> II 5  | 7.88  | 27.98 | 58.67 | 76.35  | 78.74  |
| b <sub>3</sub> III 1 | 9.51  | 4.99  | 59.45 | 72.59  | 71.94  |
| b <sub>3</sub> III 2 | 9.93  | 0.83  | 59.06 | 70.57  | 70.81  |
| b <sub>3</sub> III 3 | 6.30  | 0.37  | 57.36 | 68.90  | 69.95  |
| b <sub>3</sub> III 4 | 8.92  | 5.56  | 61.70 | 73.65  | 75.79  |
| b <sub>3</sub> III 5 | 8.30  | 8.47  | 64.27 | 76.89  | 78.06  |
| b <sub>4</sub> I 1   | 2.43  | 34.48 | 82.35 | 104.29 | 103.03 |
| b <sub>4</sub> I 2   | 3.10  | 33.75 | 85.50 | 107.38 | 106.64 |
| b <sub>4</sub> I 3   | 2.93  | 32.77 | 89.16 | 111.37 | 109.61 |
| b <sub>4</sub> I 4   | 2.52  | 33.88 | 92.40 | 113.30 | 108.88 |
| b <sub>4</sub> I 5   | 4.08  | 32.30 | 92.99 | 111.90 | 109.92 |
| b <sub>4</sub> II 1  | 2.46  | 40.57 | 91.52 | 107.19 | 107.28 |
| b <sub>4</sub> II 2  | 3.33  | 37.18 | 94.23 | 113.24 | 110.59 |
| b <sub>4</sub> II 3  | 3.22  | 48.59 | 91.39 | 109.60 | 108.49 |
| b <sub>4</sub> II 4  | 2.99  | 49.57 | 92.35 | 111.32 | 108.13 |
| b <sub>4</sub> II 5  | 4.35  | 38.42 | 89.46 | 108.83 | 105.81 |
| b <sub>4</sub> III 1 | 1.84  | 39.71 | 92.90 | 109.86 | 111.96 |
| b <sub>4</sub> III 2 | 4.69  | 40.21 | 95.94 | 115.59 | 114.81 |
| b <sub>4</sub> III 3 | 2.64  | 38.37 | 93.47 | 112.36 | 108.14 |
| b <sub>4</sub> III 4 | 4.61  | 56.80 | 97.08 | 114.75 | 110.84 |
| b <sub>4</sub> III 5 | 4.46  | 37.31 | 92.67 | 111.57 | 108.72 |
| b <sub>5</sub> I 1   | 2.43  | 9.35  | 62.46 | 81.79  | 80.59  |
| b <sub>5</sub> I 2   | 2.69  | 7.04  | 86.81 | 83.59  | 84.12  |

|                      |       |       |       |       |       |
|----------------------|-------|-------|-------|-------|-------|
| b <sub>5</sub> I 3   | 20.89 | 16.31 | 59.13 | 80.62 | 80.59 |
| b <sub>5</sub> I 4   | 1.96  | 3.78  | 60.11 | 80.76 | 81.21 |
| b <sub>5</sub> I 5   | 2.25  | 3.27  | 58.59 | 81.50 | 77.41 |
| b <sub>5</sub> II 1  | 5.21  | 15.01 | 63.28 | 81.01 | 79.98 |
| b <sub>5</sub> II 2  | 3.82  | 10.93 | 57.81 | 77.00 | 76.05 |
| b <sub>5</sub> II 3  | 4.21  | 13.15 | 57.71 | 76.74 | 76.95 |
| b <sub>5</sub> II 4  | 2.78  | 7.87  | 55.30 | 74.02 | 74.67 |
| b <sub>5</sub> II 5  | 5.07  | 17.16 | 56.60 | 75.50 | 75.57 |
| b <sub>5</sub> III 1 | 3.00  | 10.55 | 61.03 | 80.19 | 80.92 |
| b <sub>5</sub> III 2 | 4.70  | 8.99  | 61.65 | 84.07 | 79.60 |
| b <sub>5</sub> III 3 | 14.66 | 18.13 | 62.04 | 83.54 | 82.51 |
| b <sub>5</sub> III 4 | 6.71  | 12.73 | 57.41 | 77.40 | 75.95 |
| b <sub>5</sub> III 5 | 6.04  | 15.59 | 55.21 | 78.83 | 78.09 |

**Table S7.** Wheat plant height estimated of sample 4 by equal interval sampling (unit: cm).

|                      | 6 March | 28 March | 24 April | 21 May | 6 June |
|----------------------|---------|----------|----------|--------|--------|
| b <sub>1</sub> I 1   | 11.57   | 35.93    | 81.78    | 90.07  | 88.05  |
| b <sub>1</sub> I 2   | 10.50   | 31.84    | 70.95    | 83.30  | 82.44  |
| b <sub>1</sub> I 3   | 6.47    | 20.55    | 59.38    | 75.29  | 40.61  |
| b <sub>1</sub> I 4   | 3.93    | 16.32    | 57.89    | 73.34  | 73.95  |
| b <sub>1</sub> I 5   | 2.40    | 14.00    | 52.99    | 71.07  | 37.06  |
| b <sub>1</sub> II 1  | 13.23   | 45.08    | 71.79    | 81.47  | 81.29  |
| b <sub>1</sub> II 2  | 11.66   | 32.84    | 58.77    | 70.34  | 70.89  |
| b <sub>1</sub> II 3  | 5.25    | 22.13    | 45.53    | 64.63  | 65.86  |
| b <sub>1</sub> II 4  | 7.36    | 23.15    | 46.51    | 67.04  | 68.01  |
| b <sub>1</sub> II 5  | 5.20    | 28.86    | 42.31    | 61.33  | 61.93  |
| b <sub>1</sub> III 1 | 8.45    | 41.74    | 84.29    | 96.31  | 76.15  |
| b <sub>1</sub> III 2 | 6.43    | 29.85    | 58.43    | 67.10  | 68.08  |
| b <sub>1</sub> III 3 | 8.87    | 26.84    | 56.59    | 29.45  | 19.97  |
| b <sub>1</sub> III 4 | 11.05   | 26.25    | 55.06    | 60.61  | 64.22  |
| b <sub>1</sub> III 5 | 6.91    | 21.27    | 52.21    | 59.25  | 59.84  |
| b <sub>2</sub> I 1   | 5.05    | 39.09    | 95.15    | 108.38 | 92.72  |
| b <sub>2</sub> I 2   | 9.59    | 38.15    | 78.70    | 92.46  | 94.12  |
| b <sub>2</sub> I 3   | 3.90    | 32.38    | 69.67    | 84.77  | 85.15  |
| b <sub>2</sub> I 4   | 10.45   | 34.73    | 73.84    | 86.75  | 89.18  |
| b <sub>2</sub> I 5   | 6.10    | 24.76    | 67.62    | 81.99  | 85.17  |
| b <sub>2</sub> II 1  | 4.10    | 34.84    | 72.78    | 81.70  | 82.32  |
| b <sub>2</sub> II 2  | 7.30    | 38.57    | 70.06    | 80.57  | 81.48  |
| b <sub>2</sub> II 3  | 8.63    | 38.14    | 66.45    | 77.24  | 78.42  |
| b <sub>2</sub> II 4  | 6.55    | 33.90    | 59.78    | 72.67  | 73.11  |
| b <sub>2</sub> II 5  | 6.35    | 28.65    | 57.54    | 71.22  | 72.49  |
| b <sub>2</sub> III 1 | 5.02    | 37.28    | 77.50    | 85.10  | 85.10  |
| b <sub>2</sub> III 2 | 8.27    | 34.87    | 68.30    | 78.02  | 78.13  |
| b <sub>2</sub> III 3 | 9.53    | 38.55    | 66.02    | 75.61  | 76.08  |

|                     |       |       |       |        |        |
|---------------------|-------|-------|-------|--------|--------|
| b <sub>2</sub> III4 | 18.21 | 41.57 | 74.28 | 83.36  | 82.76  |
| b <sub>2</sub> III5 | 5.51  | 27.39 | 60.08 | 69.89  | 73.17  |
| b <sub>3</sub> I 1  | 2.76  | -3.23 | 51.66 | 66.74  | 68.48  |
| b <sub>3</sub> I 2  | 2.52  | -2.58 | 55.98 | 68.69  | 71.10  |
| b <sub>3</sub> I 3  | 2.84  | -2.64 | 56.23 | 70.21  | 73.84  |
| b <sub>3</sub> I 4  | 3.21  | -1.87 | 59.29 | 75.58  | 77.84  |
| b <sub>3</sub> I 5  | 2.38  | 0.35  | 58.18 | 75.05  | 76.95  |
| b <sub>3</sub> II 1 | 3.14  | 1.44  | 53.08 | 63.95  | 65.85  |
| b <sub>3</sub> II 2 | 5.68  | 1.97  | 54.97 | 67.20  | 69.91  |
| b <sub>3</sub> II 3 | 5.54  | 0.75  | 55.20 | 69.39  | 72.54  |
| b <sub>3</sub> II 4 | 5.03  | 2.66  | 54.61 | 69.13  | 71.86  |
| b <sub>3</sub> II 5 | 6.91  | 5.69  | 59.14 | 74.03  | 77.23  |
| b <sub>3</sub> III1 | 6.42  | 1.65  | 54.20 | 70.55  | 71.09  |
| b <sub>3</sub> III2 | 10.21 | 2.27  | 57.09 | 70.50  | 71.23  |
| b <sub>3</sub> III3 | 5.19  | 0.86  | 55.28 | 67.88  | 70.02  |
| b <sub>3</sub> III4 | 6.88  | 15.77 | 60.00 | 73.03  | 73.94  |
| b <sub>3</sub> III5 | 7.82  | 17.60 | 63.42 | 77.63  | 73.93  |
| b <sub>4</sub> I 1  | 2.40  | 35.60 | 88.14 | 105.98 | 104.63 |
| b <sub>4</sub> I 2  | 2.56  | 33.40 | 87.88 | 107.55 | 106.87 |
| b <sub>4</sub> I 3  | 2.91  | 31.86 | 85.22 | 107.75 | 105.77 |
| b <sub>4</sub> I 4  | 4.36  | 38.73 | 91.82 | 112.89 | 111.82 |
| b <sub>4</sub> I 5  | 3.76  | 33.30 | 95.13 | 112.46 | 109.91 |
| b <sub>4</sub> II 1 | 2.91  | 40.43 | 89.65 | 108.00 | 107.67 |
| b <sub>4</sub> II 2 | 2.06  | 37.35 | 92.59 | 109.38 | 109.48 |
| b <sub>4</sub> II 3 | 1.76  | 34.42 | 89.11 | 109.49 | 105.59 |
| b <sub>4</sub> II 4 | 2.40  | 37.57 | 91.60 | 111.09 | 107.99 |
| b <sub>4</sub> II 5 | 4.83  | 38.90 | 93.72 | 109.47 | 108.38 |
| b <sub>4</sub> III1 | 2.95  | 41.92 | 94.11 | 110.58 | 113.51 |
| b <sub>4</sub> III2 | 3.19  | 39.27 | 94.30 | 111.30 | 112.84 |
| b <sub>4</sub> III3 | 2.33  | 35.65 | 92.71 | 111.90 | 109.98 |
| b <sub>4</sub> III4 | 3.57  | 41.91 | 95.99 | 114.73 | 113.29 |
| b <sub>4</sub> III5 | 3.86  | 37.50 | 96.86 | 113.73 | 111.33 |
| b <sub>5</sub> I 1  | 2.09  | 10.42 | 61.30 | 81.94  | 80.79  |
| b <sub>5</sub> I 2  | 3.10  | 7.89  | 86.35 | 106.60 | 82.94  |
| b <sub>5</sub> I 3  | 2.23  | 5.73  | 60.69 | 82.38  | 81.98  |
| b <sub>5</sub> I 4  | 2.94  | 3.01  | 59.72 | 81.86  | 82.67  |
| b <sub>5</sub> I 5  | 2.62  | 3.16  | 59.05 | 79.80  | 79.47  |
| b <sub>5</sub> II 1 | 3.94  | 13.25 | 64.21 | 81.77  | 79.18  |
| b <sub>5</sub> II 2 | 3.20  | 10.60 | 58.26 | 77.23  | 75.57  |
| b <sub>5</sub> II 3 | 3.50  | 15.38 | 59.03 | 77.67  | 77.31  |
| b <sub>5</sub> II 4 | 3.40  | 4.72  | 54.89 | 73.69  | 74.98  |
| b <sub>5</sub> II 5 | 5.27  | 13.86 | 55.11 | 74.98  | 76.28  |
| b <sub>5</sub> III1 | 3.68  | 11.62 | 64.33 | 78.96  | 82.66  |
| b <sub>5</sub> III2 | 2.96  | 6.37  | 59.56 | 81.39  | 80.41  |

|                     |      |       |       |       |       |
|---------------------|------|-------|-------|-------|-------|
| b <sub>5</sub> III3 | 6.00 | 11.50 | 61.51 | 83.96 | 83.50 |
| b <sub>5</sub> III4 | 6.33 | 12.97 | 59.30 | 81.88 | 82.60 |
| b <sub>5</sub> III5 | 4.67 | 14.56 | 54.05 | 76.23 | 75.04 |

**Table S8.** Wheat plant height estimated of sample 5 by equal interval sampling (unit: cm).

|                     | 6 March | 28 March | 24 April | 21 May | 6 June |
|---------------------|---------|----------|----------|--------|--------|
| b <sub>1</sub> I 1  | 8.78    | 39.28    | 83.24    | 90.26  | 92.47  |
| b <sub>1</sub> I 2  | 6.02    | 29.72    | 66.68    | 79.60  | 73.45  |
| b <sub>1</sub> I 3  | 4.59    | 23.06    | 59.45    | 74.97  | 68.32  |
| b <sub>1</sub> I 4  | 4.27    | 17.70    | 56.33    | 72.06  | 74.66  |
| b <sub>1</sub> I 5  | 3.29    | 15.15    | 53.62    | 72.56  | 7.37   |
| b <sub>1</sub> II 1 | 8.30    | 38.69    | 69.48    | 79.77  | 81.02  |
| b <sub>1</sub> II 2 | 11.08   | 32.49    | 60.95    | 72.56  | 71.67  |
| b <sub>1</sub> II 3 | 3.91    | 22.56    | 48.11    | 65.15  | 66.06  |
| b <sub>1</sub> II 4 | 6.92    | 21.57    | 46.74    | 62.83  | 65.37  |
| b <sub>1</sub> II 5 | 5.32    | 15.79    | 42.40    | 58.39  | 59.13  |
| b <sub>1</sub> III1 | 7.26    | 39.80    | 70.09    | 75.07  | 75.52  |
| b <sub>1</sub> III2 | 8.06    | 35.75    | 61.85    | 65.75  | 69.26  |
| b <sub>1</sub> III3 | 4.91    | 25.94    | 54.03    | 13.55  | 8.93   |
| b <sub>1</sub> III4 | 8.15    | 24.86    | 56.07    | 60.62  | 59.94  |
| b <sub>1</sub> III5 | 9.73    | 23.19    | 56.21    | 59.94  | 57.20  |
| b <sub>2</sub> I 1  | 4.27    | 37.80    | 95.86    | 105.77 | 92.61  |
| b <sub>2</sub> I 2  | 5.35    | 39.85    | 76.78    | 90.68  | 92.24  |
| b <sub>2</sub> I 3  | 5.44    | 32.66    | 68.49    | 84.60  | 80.73  |
| b <sub>2</sub> I 4  | 5.94    | 32.96    | 72.74    | 84.83  | 86.13  |
| b <sub>2</sub> I 5  | 3.89    | 26.22    | 64.77    | 80.56  | 81.24  |
| b <sub>2</sub> II 1 | 5.57    | 39.66    | 76.16    | 84.24  | 83.89  |
| b <sub>2</sub> II 2 | 4.52    | 34.88    | 66.27    | 78.86  | 80.59  |
| b <sub>2</sub> II 3 | 8.80    | 34.78    | 60.94    | 74.02  | 73.31  |
| b <sub>2</sub> II 4 | 10.94   | 32.54    | 58.52    | 73.28  | 70.81  |
| b <sub>2</sub> II 5 | 5.76    | 26.42    | 53.58    | 67.54  | 67.15  |
| b <sub>2</sub> III1 | 3.68    | 36.93    | 75.87    | 82.33  | 82.47  |
| b <sub>2</sub> III2 | 6.70    | 33.59    | 69.56    | 78.35  | 79.09  |
| b <sub>2</sub> III3 | 7.30    | 33.99    | 66.75    | 76.07  | 76.73  |
| b <sub>2</sub> III4 | 6.97    | 29.06    | 62.42    | 74.01  | 71.81  |
| b <sub>2</sub> III5 | 6.11    | 25.69    | 62.08    | 74.16  | 75.57  |
| b <sub>3</sub> I 1  | 2.79    | -3.62    | 50.90    | 65.92  | 68.18  |
| b <sub>3</sub> I 2  | 2.56    | -1.93    | 57.45    | 69.78  | 73.03  |
| b <sub>3</sub> I 3  | 2.48    | -3.77    | 57.39    | 71.93  | 74.14  |
| b <sub>3</sub> I 4  | 3.14    | -2.15    | 57.24    | 73.44  | 75.87  |
| b <sub>3</sub> I 5  | 3.07    | 0.44     | 60.25    | 75.61  | 79.35  |
| b <sub>3</sub> II 1 | 3.07    | -0.15    | 54.19    | 66.56  | 68.12  |
| b <sub>3</sub> II 2 | 6.40    | 2.71     | 55.87    | 68.27  | 70.02  |
| b <sub>3</sub> II 3 | 5.76    | 0.95     | 56.40    | 67.34  | 70.66  |

|                      |      |       |       |        |        |
|----------------------|------|-------|-------|--------|--------|
| b <sub>3</sub> II 4  | 6.03 | 2.23  | 54.42 | 69.49  | 72.33  |
| b <sub>3</sub> II 5  | 5.68 | 1.66  | 55.82 | 71.28  | 74.14  |
| b <sub>3</sub> III 1 | 6.14 | 3.10  | 55.37 | 69.50  | 71.33  |
| b <sub>3</sub> III 2 | 8.67 | 2.39  | 56.48 | 69.22  | 70.11  |
| b <sub>3</sub> III 3 | 3.13 | 1.29  | 52.93 | 63.94  | 65.95  |
| b <sub>3</sub> III 4 | 7.60 | 4.37  | 61.19 | 73.96  | 71.78  |
| b <sub>3</sub> III 5 | 8.37 | 13.08 | 62.89 | 76.53  | 77.49  |
| b <sub>4</sub> I 1   | 1.78 | 35.93 | 90.83 | 108.50 | 108.96 |
| b <sub>4</sub> I 2   | 4.05 | 35.99 | 91.74 | 113.57 | 112.31 |
| b <sub>4</sub> I 3   | 2.93 | 32.33 | 87.68 | 108.91 | 106.40 |
| b <sub>4</sub> I 4   | 4.97 | 35.18 | 92.88 | 113.29 | 109.47 |
| b <sub>4</sub> I 5   | 3.58 | 31.86 | 92.05 | 110.21 | 108.28 |
| b <sub>4</sub> II 1  | 3.24 | 43.58 | 93.45 | 109.16 | 110.30 |
| b <sub>4</sub> II 2  | 2.10 | 40.03 | 89.98 | 107.44 | 107.99 |
| b <sub>4</sub> II 3  | 2.12 | 38.31 | 93.64 | 109.62 | 107.08 |
| b <sub>4</sub> II 4  | 1.99 | 36.82 | 90.82 | 108.92 | 105.54 |
| b <sub>4</sub> II 5  | 3.97 | 50.12 | 92.64 | 108.91 | 106.78 |
| b <sub>4</sub> III 1 | 2.59 | 43.36 | 93.98 | 111.42 | 112.21 |
| b <sub>4</sub> III 2 | 4.32 | 41.35 | 96.56 | 113.39 | 110.47 |
| b <sub>4</sub> III 3 | 4.02 | 38.41 | 93.06 | 113.38 | 108.41 |
| b <sub>4</sub> III 4 | 4.02 | 42.56 | 93.10 | 112.92 | 105.74 |
| b <sub>4</sub> III 5 | 4.96 | 44.54 | 95.55 | 114.49 | 105.71 |
| b <sub>5</sub> I 1   | 1.74 | 10.25 | 59.75 | 79.54  | 77.53  |
| b <sub>5</sub> I 2   | 1.71 | 6.11  | 62.34 | 83.10  | 83.52  |
| b <sub>5</sub> I 3   | 3.09 | 5.56  | 61.19 | 83.08  | 83.59  |
| b <sub>5</sub> I 4   | 3.14 | 3.10  | 58.09 | 80.96  | 82.64  |
| b <sub>5</sub> I 5   | 3.78 | 4.11  | 57.42 | 79.16  | 80.00  |
| b <sub>5</sub> II 1  | 4.22 | 13.54 | 64.72 | 79.47  | 78.53  |
| b <sub>5</sub> II 2  | 4.09 | 11.45 | 59.50 | 76.33  | 75.08  |
| b <sub>5</sub> II 3  | 3.84 | 12.04 | 58.17 | 78.59  | 78.38  |
| b <sub>5</sub> II 4  | 2.19 | 7.70  | 56.76 | 74.77  | 75.41  |
| b <sub>5</sub> II 5  | 5.38 | 9.43  | 53.09 | 73.20  | 74.86  |
| b <sub>5</sub> III 1 | 3.03 | 12.27 | 66.15 | 83.77  | 84.36  |
| b <sub>5</sub> III 2 | 3.07 | 6.60  | 58.62 | 81.96  | 79.68  |
| b <sub>5</sub> III 3 | 7.02 | 17.82 | 62.96 | 84.54  | 85.94  |
| b <sub>5</sub> III 4 | 5.66 | 13.20 | 57.74 | 83.01  | 88.20  |
| b <sub>5</sub> III 5 | 4.70 | 13.65 | 55.44 | 78.73  | 79.06  |

**Table S9.** Heading dates obtained by experts and estimated by sampling methods 1, 2, and 3.

| Plot               | Reference heading date | Estimated heading date (sampling method 1) | Estimated heading date (sampling method 2) | Estimated heading date (sampling method 3) |
|--------------------|------------------------|--------------------------------------------|--------------------------------------------|--------------------------------------------|
| b <sub>1</sub> I 1 | 20 April               | 16 April                                   | 16 April                                   | 16 April                                   |
| b <sub>1</sub> I 2 | 21 April               | 19 April                                   | 22 April                                   | 21 April                                   |

|                      |          |          |          |          |
|----------------------|----------|----------|----------|----------|
| b <sub>1</sub> I 3   | 22 April | 22 April | 25 April | 24 April |
| b <sub>1</sub> I 4   | 23 April | 22 April | 24 April | 25 April |
| b <sub>1</sub> I 5   | 23 April | 24 April | 20 April | 28 April |
| b <sub>1</sub> II 1  | 20 April | 13 April | 14 April | 15 April |
| b <sub>1</sub> II 2  | 22 April | 20 April | 21 April | 23 April |
| b <sub>1</sub> II 3  | 22 April | 25 April | 29 April | 29 April |
| b <sub>1</sub> II 4  | 23 April | 27 April | 01 May   | 05 May   |
| b <sub>1</sub> II 5  | 23 April | 25 April | 28 April | 28 April |
| b <sub>1</sub> III 1 | 12 April | 11 April | 11 April | 09 April |
| b <sub>1</sub> III 2 | 12 April | 16 April | 15 April | 16 April |
| b <sub>1</sub> III 3 | 14 April | 16 April | 27 March | 18 April |
| b <sub>1</sub> III 4 | 16 April | 18 April | 18 April | 18 April |
| b <sub>1</sub> III 5 | 17 April | 18 April | 03 April | 16 April |
| b <sub>2</sub> I 1   | 23 April | 13 April | 14 April | 11 April |
| b <sub>2</sub> I 2   | 23 April | 17 April | 20 April | 19 April |
| b <sub>2</sub> I 3   | 24 April | 19 April | 21 April | 20 April |
| b <sub>2</sub> I 4   | 24 April | 20 April | 18 April | 21 April |
| b <sub>2</sub> I 5   | 26 April | 20 April | 21 April | 24 April |
| b <sub>2</sub> II 1  | 21 April | 16 April | 15 April | 14 April |
| b <sub>2</sub> II 2  | 21 April | 19 April | 16 April | 17 April |
| b <sub>2</sub> II 3  | 23 April | 21 April | 23 April | 20 April |
| b <sub>2</sub> II 4  | 23 April | 23 April | 23 April | 21 April |
| b <sub>2</sub> II 5  | 23 April | 24 April | 24 April | 23 April |
| b <sub>2</sub> III 1 | 16 April | 16 April | 14 April | 13 April |
| b <sub>2</sub> III 2 | 17 April | 15 April | 14 April | 15 April |
| b <sub>2</sub> III 3 | 17 April | 17 April | 16 April | 17 April |
| b <sub>2</sub> III 4 | 19 April | 19 April | 17 April | 18 April |
| b <sub>2</sub> III 5 | 19 April | 20 April | 18 April | 18 April |
| b <sub>3</sub> I 1   | 23 April | 25 April | 25 April | 25 April |
| b <sub>3</sub> I 2   | 23 April | 24 April | 25 April | 25 April |
| b <sub>3</sub> I 3   | 23 April | 24 April | 25 April | 25 April |
| b <sub>3</sub> I 4   | 23 April | 25 April | 26 April | 25 April |
| b <sub>3</sub> I 5   | 25 April | 26 April | 25 April | 25 April |
| b <sub>3</sub> II 1  | 22 April | 24 April | 21 April | 24 April |
| b <sub>3</sub> II 2  | 22 April | 24 April | 24 April | 24 April |
| b <sub>3</sub> II 3  | 23 April | 24 April | 24 April | 25 April |
| b <sub>3</sub> II 4  | 23 April | 28 April | 27 April | 25 April |
| b <sub>3</sub> II 5  | 23 April | 01 May   | 26 April | 26 April |
| b <sub>3</sub> III 1 | 21 April | 29 April | 24 April | 24 April |
| b <sub>3</sub> III 2 | 21 April | 25 April | 23 April | 24 April |
| b <sub>3</sub> III 3 | 21 April | 23 April | 23 April | 24 April |
| b <sub>3</sub> III 4 | 22 April | 28 April | 24 April | 23 April |
| b <sub>3</sub> III 5 | 22 April | 26 April | 24 April | 23 April |
| b <sub>4</sub> I 1   | 24 April | 19 April | 22 April | 23 April |

|                      |          |          |          |          |
|----------------------|----------|----------|----------|----------|
| b <sub>4</sub> I 2   | 24 April | 22 April | 21 April | 23 April |
| b <sub>4</sub> I 3   | 24 April | 22 April | 22 April | 23 April |
| b <sub>4</sub> I 4   | 24 April | 21 April | 22 April | 21 April |
| b <sub>4</sub> I 5   | 24 April | 21 April | 20 April | 21 April |
| b <sub>4</sub> II 1  | 23 April | 18 April | 18 April | 19 April |
| b <sub>4</sub> II 2  | 23 April | 19 April | 19 April | 20 April |
| b <sub>4</sub> II 3  | 23 April | 19 April | 19 April | 19 April |
| b <sub>4</sub> II 4  | 23 April | 19 April | 18 April | 19 April |
| b <sub>4</sub> II 5  | 23 April | 20 April | 19 April | 18 April |
| b <sub>4</sub> III 1 | 23 April | 19 April | 20 April | 21 April |
| b <sub>4</sub> III 2 | 23 April | 19 April | 19 April | 20 April |
| b <sub>4</sub> III 3 | 23 April | 20 April | 19 April | 20 April |
| b <sub>4</sub> III 4 | 23 April | 17 April | 17 April | 17 April |
| b <sub>4</sub> III 5 | 23 April | 18 April | 19 April | 19 April |
| b <sub>5</sub> I 1   | 29 April | 29 April | 26 April | 26 April |
| b <sub>5</sub> I 2   | 29 April | 07 April | 06 April | 16 April |
| b <sub>5</sub> I 3   | 30 April | 29 April | 28 April | 29 April |
| b <sub>5</sub> I 4   | 30 April | 29 April | 27 April | 27 April |
| b <sub>5</sub> I 5   | 01 May   | 27 April | 27 April | 26 April |
| b <sub>5</sub> II 1  | 02 May   | 27 April | 23 April | 24 April |
| b <sub>5</sub> II 2  | 28 April | 27 April | 25 April | 26 April |
| b <sub>5</sub> II 3  | 28 April | 30 April | 28 April | 27 April |
| b <sub>5</sub> II 4  | 29 April | 02 May   | 27 April | 27 April |
| b <sub>5</sub> II 5  | 29 April | 02 May   | 28 April | 28 April |
| b <sub>5</sub> III 1 | 27 April | 28 April | 26 April | 26 April |
| b <sub>5</sub> III 2 | 27 April | 26 April | 27 April | 27 April |
| b <sub>5</sub> III 3 | 28 April | 01 May   | 29 April | 29 April |
| b <sub>5</sub> III 4 | 28 April | 02 May   | 27 April | 29 April |
| b <sub>5</sub> III 5 | 29 April | 05 May   | 30 April | 01 May   |

**Table S10.** Estimated heading date of equal interval sampling. Diagonal lines in the table represent abnormal growth curves (severe lodging and sharp drop in plant height) and the excluded data that could not be used to determine the heading dates.

|                     | reference | sample_1 | sample_2 | sample_3 | sample_4 | sample_5 | average  |
|---------------------|-----------|----------|----------|----------|----------|----------|----------|
| b <sub>1</sub> I 1  | 20 April  | 17 April | 14 April | 16 April | 16 April | 15 April | 16 April |
| b <sub>1</sub> I 2  | 21 April  | 23 April | 23 April | 22 April | 21 April | 17 April | 21 April |
| b <sub>1</sub> I 3  | 22 April  | 23 April | 24 April | 28 April | /        | 21 April | 24 April |
| b <sub>1</sub> I 4  | 23 April  | 29 April | 21 April | 27 April | 25 April | 27 April | 25 April |
| b <sub>1</sub> I 5  | 23 April  | /        | /        | 28 April | /        | /        | 28 April |
| b <sub>1</sub> II 1 | 20 April  | 14 April | 16 April | 18 April | 13 April | 16 April | 15 April |
| b <sub>1</sub> II 2 | 22 April  | 27 April | 20 April | 27 April | 21 April | 20 April | 23 April |
| b <sub>1</sub> II 3 | 22 April  | 03 May   | 29 April | 24 April | 04 May   | 29 April | 29 April |
| b <sub>1</sub> II 4 | 23 April  | 07 May   | 01 May   | 08 May   | 06 May   | 03 May   | 05 May   |
| b <sub>1</sub> II 5 | 23 April  | /        | 28 April | 22 April | 02 May   | 02 May   | 28 April |

|         |          |          |          |          |          |          |          |
|---------|----------|----------|----------|----------|----------|----------|----------|
| b1III1  | 12 April | 07 April | /        | 08 April | 10 April | 10 April | 09 April |
| b1III2  | 12 April | 17 April | 17 April | 19 April | 17 April | 11 April | 16 April |
| b1III3  | 14 April | 18 April | 18 April | /        | /        | /        | 18 April |
| b1III4  | 16 April | 20 April | 17 April | 14 April | 21 April | 16 April | 18 April |
| b1III5  | 17 April | /        | /        | 13 April | 20 April | 16 April | 16 April |
| b2 I 1  | 23 April | 07 April | 13 April | 14 April | 12 April | 11 April | 11 April |
| b2 I 2  | 23 April | 20 April | 20 April | 19 April | 20 April | 18 April | 19 April |
| b2 I 3  | 24 April | 20 April | 17 April | 23 April | 21 April | 20 April | 20 April |
| b2 I 4  | 24 April | 20 April | 21 April | 21 April | 22 April | 19 April | 21 April |
| b2 I 5  | 26 April | 24 April | 22 April | 25 April | 24 April | 24 April | 24 April |
| b2 II 1 | 21 April | 14 April | 14 April | 15 April | 15 April | 12 April | 14 April |
| b2 II 2 | 21 April | 19 April | 17 April | 18 April | 15 April | 18 April | 17 April |
| b2 II 3 | 23 April | 20 April | 19 April | 24 April | 16 April | 19 April | 20 April |
| b2 II 4 | 23 April | 21 April | 19 April | 25 April | 19 April | 22 April | 21 April |
| b2 II 5 | 23 April | 24 April | 22 April | 24 April | 23 April | 24 April | 23 April |
| b2III1  | 16 April | 14 April | 14 April | 14 April | 13 April | 11 April | 13 April |
| b2III2  | 17 April | 15 April | 15 April | 12 April | 17 April | 16 April | 15 April |
| b2III3  | 17 April | 18 April | 16 April | 18 April | 15 April | 16 April | 17 April |
| b2III4  | 19 April | 19 April | 20 April | 15 April | 17 April | 19 April | 18 April |
| b2III5  | 19 April | 18 April | 18 April | 15 April | 21 April | 22 April | 18 April |
| b3 I 1  | 23 April | 25 April |
| b3 I 2  | 23 April | 25 April |
| b3 I 3  | 23 April | 25 April | /        | 25 April | 25 April | 25 April | 25 April |
| b3 I 4  | 23 April | 25 April | 27 April | 27 April | 25 April | 25 April | 25 April |
| b3 I 5  | 25 April | 25 April | 25 April | 26 April | 25 April | 25 April | 25 April |
| b3 II 1 | 22 April | 24 April | 25 April | 24 April | 24 April | 25 April | 24 April |
| b3 II 2 | 22 April | 24 April |
| b3 II 3 | 23 April | 25 April | 24 April | 25 April | 25 April | 24 April | 25 April |
| b3 II 4 | 23 April | 25 April |
| b3 II 5 | 23 April | 29 April | 24 April | 29 April | 25 April | 25 April | 26 April |
| b3III1  | 21 April | 24 April | 24 April | 23 April | 25 April | 25 April | 24 April |
| b3III2  | 21 April | 24 April | 23 April | 23 April | 24 April | 24 April | 24 April |
| b3III3  | 21 April | 25 April | /        | 24 April | 24 April | 24 April | 24 April |
| b3III4  | 22 April | 24 April | 23 April | 23 April | 24 April | 22 April | 23 April |
| b3III5  | 22 April | 23 April | 24 April | 23 April | 23 April | 24 April | 23 April |
| b4 I 1  | 24 April | 01 May   | 23 April | 23 April | 20 April | 20 April | 23 April |
| b4 I 2  | 24 April | 25 April | 25 April | 23 April | 22 April | 22 April | 23 April |
| b4 I 3  | 24 April | 23 April | 23 April | 23 April | 24 April | 22 April | 23 April |
| b4 I 4  | 24 April | 21 April | 22 April | 21 April | 22 April | 21 April | 21 April |
| b4 I 5  | 24 April | 23 April | 22 April | 21 April | 20 April | 21 April | 21 April |
| b4 II 1 | 23 April | 19 April | 20 April | 18 April | 20 April | 17 April | 19 April |
| b4 II 2 | 23 April | 20 April | 21 April | 20 April | 19 April | 19 April | 20 April |
| b4 II 3 | 23 April | 20 April | 20 April | 16 April | 21 April | 18 April | 19 April |
| b4 II 4 | 23 April | 21 April | 19 April | 15 April | 20 April | 19 April | 19 April |



|                      |          |          |          |          |          |          |          |
|----------------------|----------|----------|----------|----------|----------|----------|----------|
| b <sub>4</sub> II 5  | 23 April | 20 April | 19 April | 20 April | 18 April | 14 April | 18 April |
| b <sub>4</sub> III 1 | 23 April | 21 April | 27 April | 20 April | 19 April | 18 April | 21 April |
| b <sub>4</sub> III 2 | 23 April | 22 April | 20 April | 21 April | 20 April | 18 April | 20 April |
| b <sub>4</sub> III 3 | 23 April | 21 April | 20 April | 19 April | 20 April | 20 April | 20 April |
| b <sub>4</sub> III 4 | 23 April | 19 April | 18 April | 11 April | 19 April | 17 April | 17 April |
| b <sub>4</sub> III 5 | 23 April | 20 April | 20 April | 20 April | 19 April | 16 April | 19 April |
| b <sub>5</sub> I 1   | 29 April | 26 April | 27 April | 26 April | 27 April | 26 April | 26 April |
| b <sub>5</sub> I 2   | 29 April | /        | /        | 02 April | 19 April | 26 April | 16 April |
| b <sub>5</sub> I 3   | 30 April | 27 April | 27 April | 09 May   | 27 April | 27 April | 29 April |
| b <sub>5</sub> I 4   | 30 April | 27 April | 27 April | 26 April | 27 April | 27 April | 27 April |
| b <sub>5</sub> I 5   | 01 May   | 25 April | 26 April | 26 April | 26 April | 27 April | 26 April |
| b <sub>5</sub> II 1  | 02 May   | 25 April | 24 April | 25 April | 24 April | 23 April | 24 April |
| b <sub>5</sub> II 2  | 28 April | 26 April | 27 April | 27 April | 26 April | 25 April | 26 April |
| b <sub>5</sub> II 3  | 28 April | 27 April | 27 April | 27 April | 27 April | 28 April | 27 April |
| b <sub>5</sub> II 4  | 29 April | 28 April | 28 April | 27 April | 27 April | 26 April | 27 April |
| b <sub>5</sub> II 5  | 29 April | 29 April | 27 April | 28 April | 29 April | 29 April | 28 April |
| b <sub>5</sub> III 1 | 27 April | 25 April | 26 April | 27 April | 25 April | 25 April | 26 April |
| b <sub>5</sub> III 2 | 27 April | 27 April | 27 April | 26 April | 27 April | 27 April | 27 April |
| b <sub>5</sub> III 3 | 28 April | 29 April | 29 April | 02 May   | 28 April | 29 April | 29 April |
| b <sub>5</sub> III 4 | 28 April | 01 May   | 28 April | 28 April | 29 April | 03 May   | 29 April |
| b <sub>5</sub> III 5 | 29 April | 02 May   | 03 May   | 01 May   | 30 April | 01 May   | 01 May   |

---

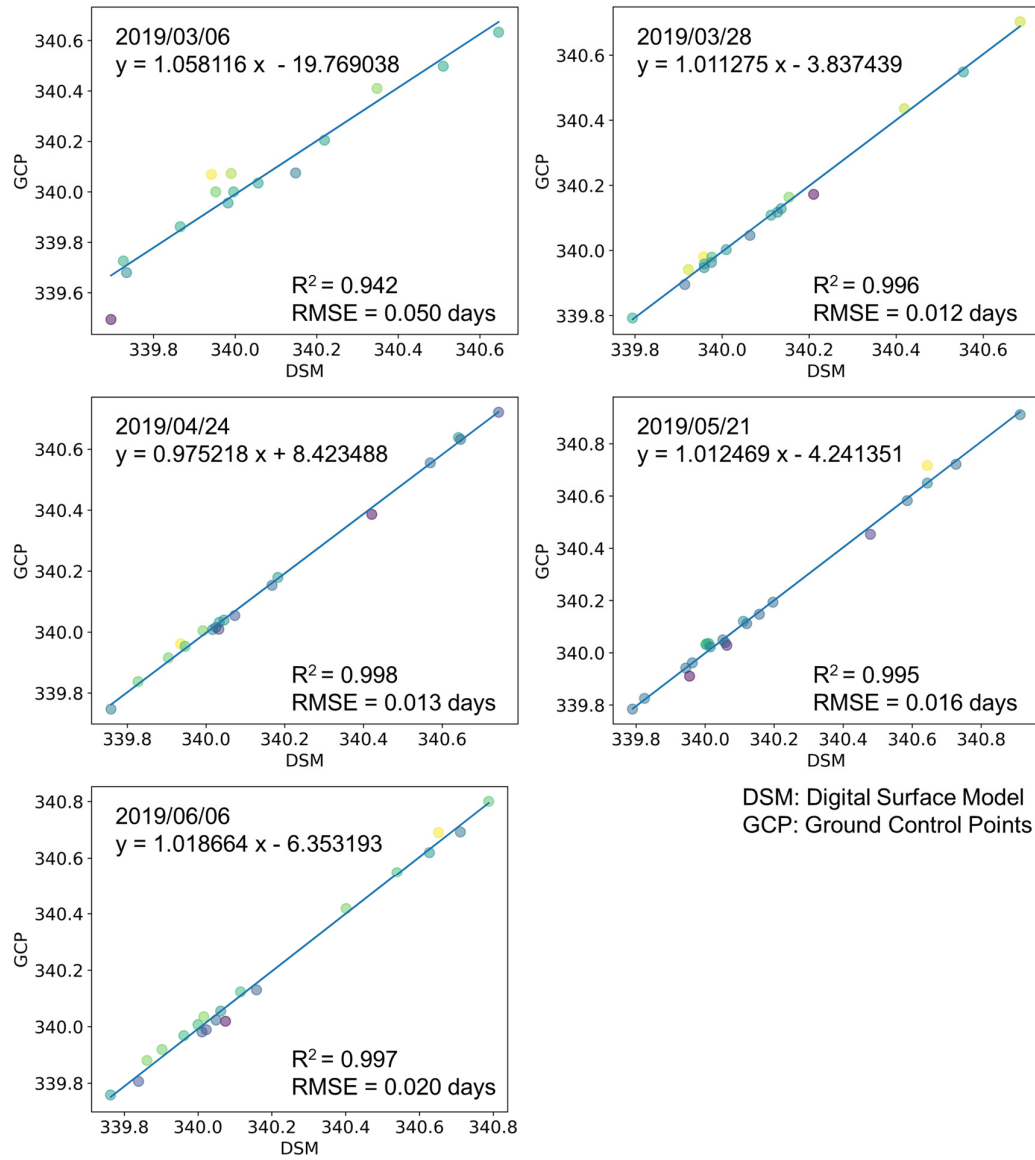

**Figure S1:** value correction of Digital Surface Model
